# Supplementary material for: Structural diversity and magnetic properties of Co(ii)/Mn(ii)/Ni(ii) coordination polymers constructed from an unsymmetrical tetracarboxylic acid and varying N-donor ligands
Source: Royal Society of Chemistry journal article supplement (doi:10.1039/c8ce00692j), 2018-01-01
Supplement: c8ce00692j1.pdf [file c8ce00692j1.pdf]

## Supplementary Information

### Structural diversity and magnetic properties of Co(II)/Mn(II)/Ni(II) coordination polymers constructed from an unsymmetrical tetracarboxylic acid and varying N- donor ligands

Qi Yue\*, Xu Liu, Wei-Xiao Guo and En-Qing Gao

School of Chemistry and Molecular Engineering, Shanghai Key Laboratory of  
Green Chemistry and Chemical Processes, East China Normal University,  
Shanghai 200241, P.R. China

#### Table of Contents

**Fig. S1.** The 3D supramolecular structure featuring 1D stacking channel of **1**.

**Fig. S2.** The 2D double-layered network of **6**.

**Fig. S3.** The hexagonal channel in the 2D double-layered network of **6**.

**Fig. S4.** Experimental (red) and simulated (black) PXRD patterns of **1-7**.

**Fig. S5.** TGA curves of **1-7**.

**Fig. S6.** Infrared spectra of **1-7**.

**Table S1-7.** Main bond lengths and angles of **1-7**.

**Table S8.** Parameters of hydrogen bonds (Å, °) for **3** and **4**.

**Table S9.** The comparison of the dihedral angles for **1-7**.

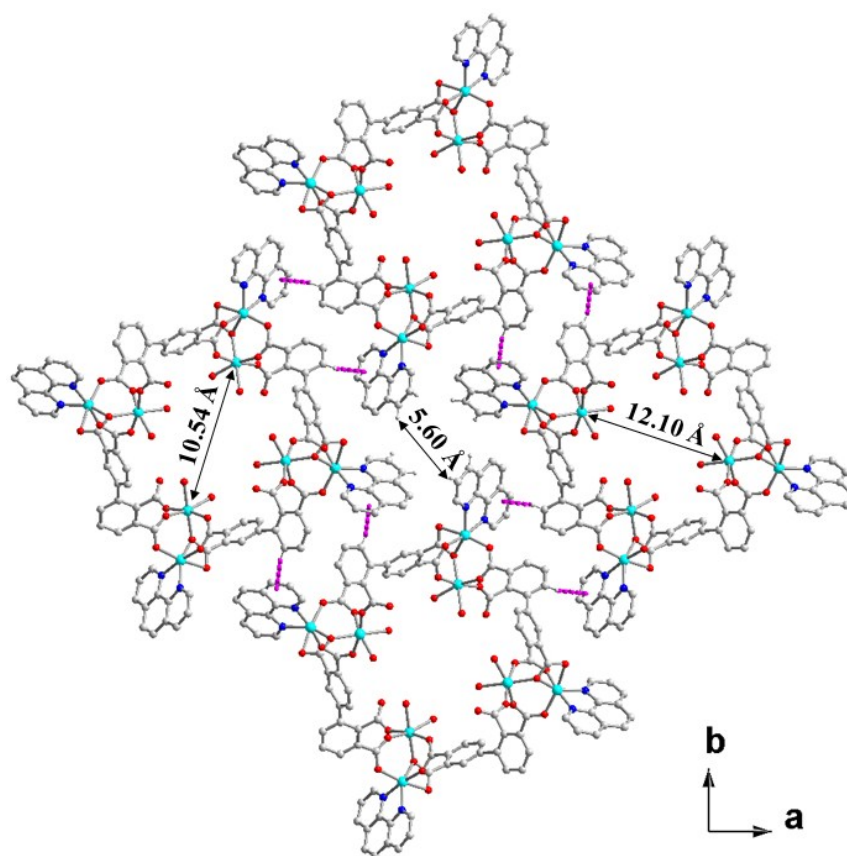

**Fig. S1.** The 3D supramolecular structure featuring 1D stacking channel of **1**.

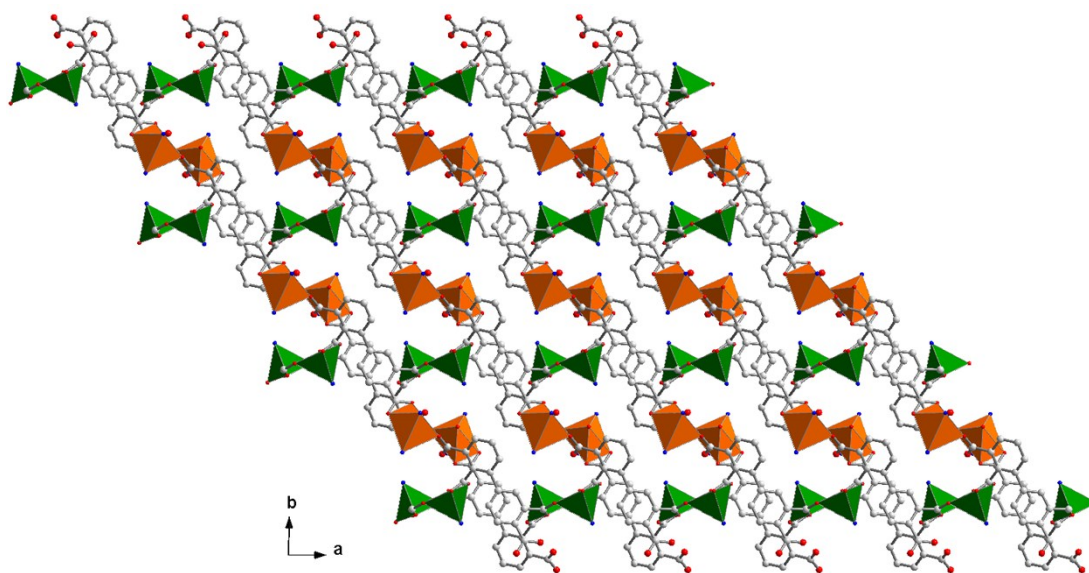

**Fig. S2.** The 2D double-layered network of **6** viewed along the *c* axis.

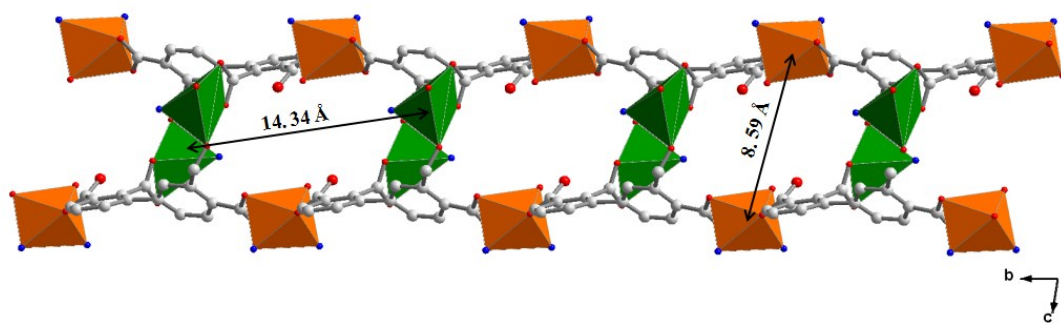

**Fig. S3.** The hexagonal channels in the 2D double-layered network of **6**.

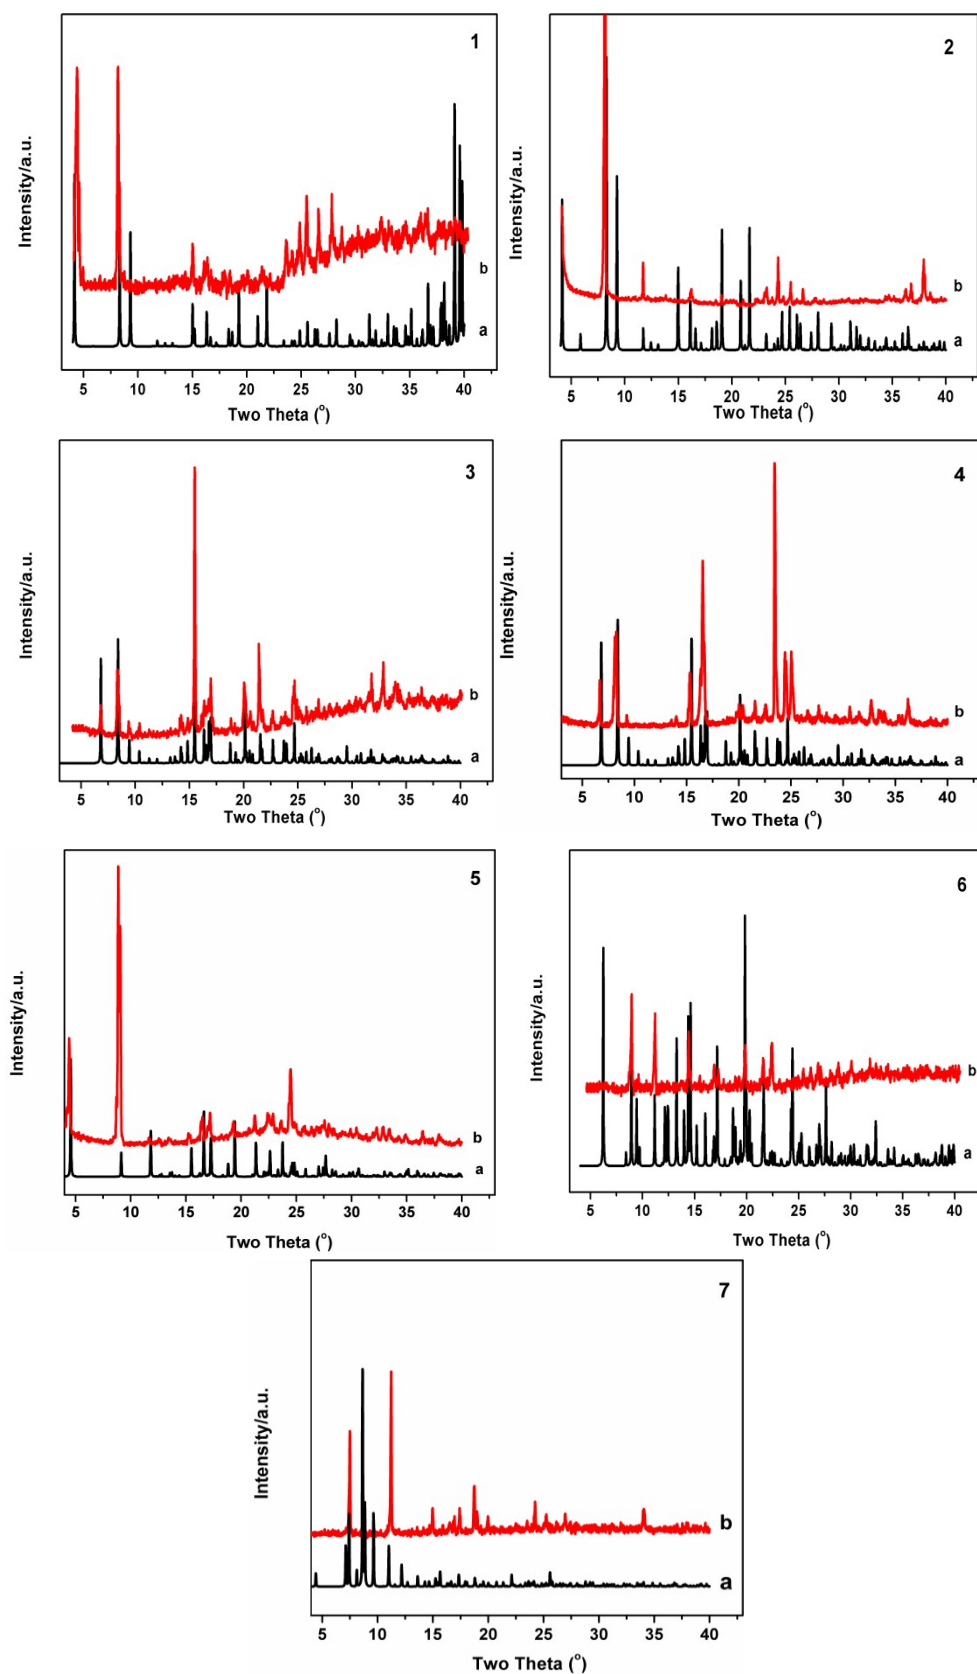

**Fig. S4.** PXRD patterns of 1-7. a) Simulated from single crystal structure data. b) Experimental data. The differences between the calculated and observed patterns in intensity may be due to the orientation of the crystals.

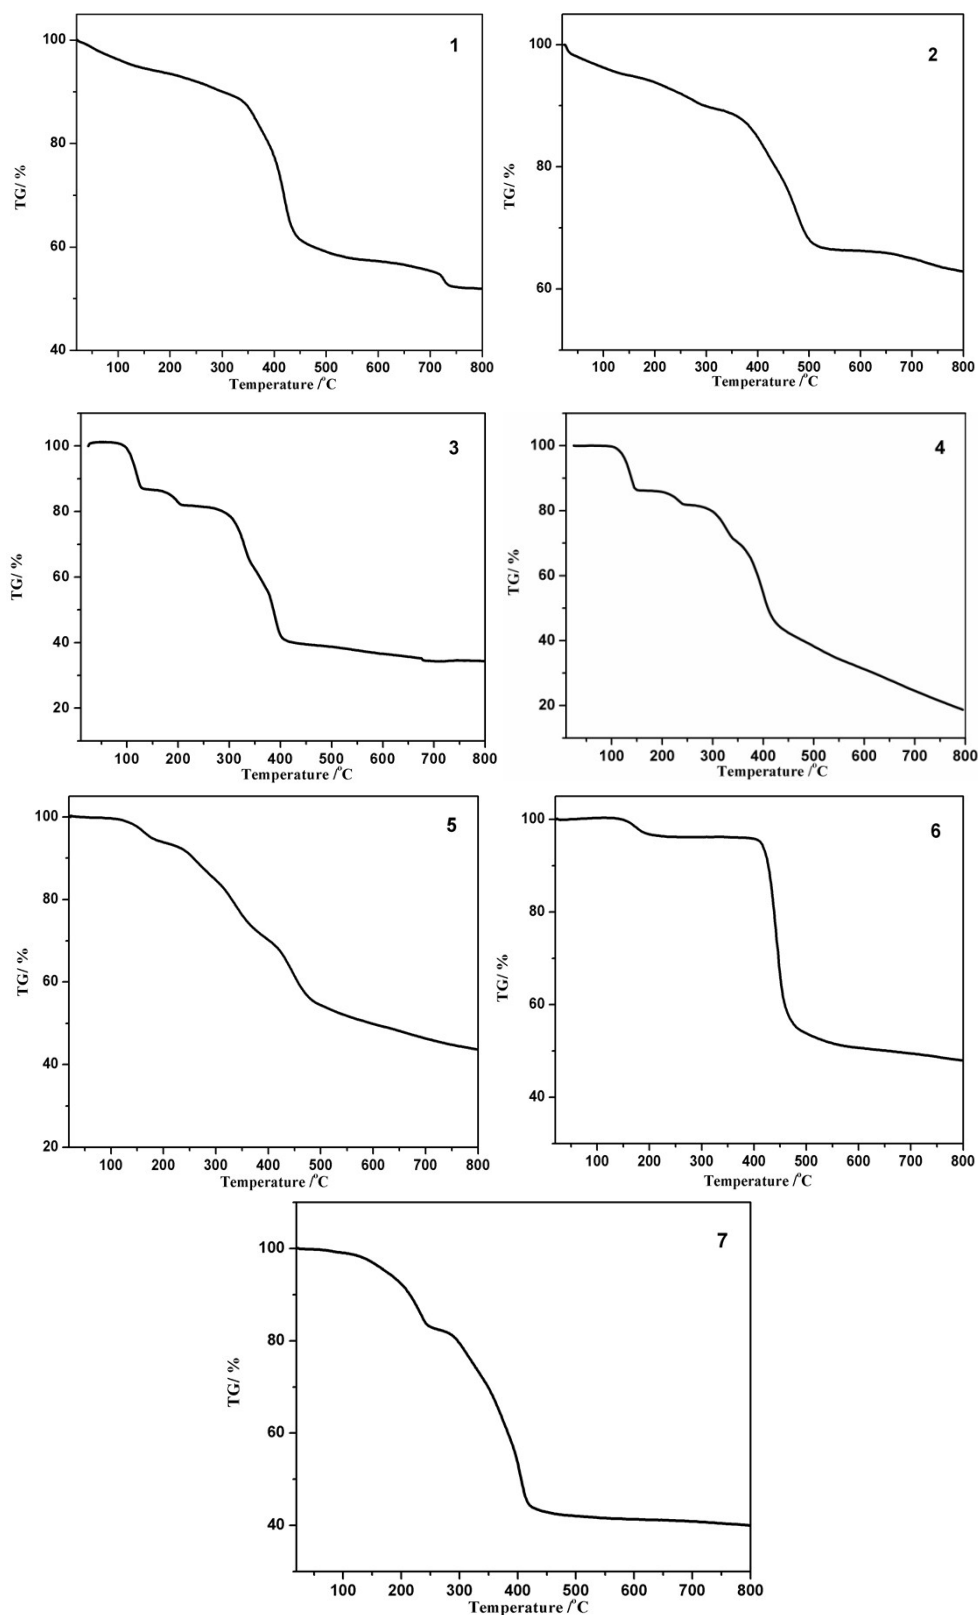

**Fig. S5.** TGA curves of 1-7.

For **1**, the weight loss of about 12.6 % from the room temperature to 340 °C corresponds to the departure of three lattice and two coordinated water molecules (calcd 12.38 %), and the remaining framework is thermally stable up to 350 °C, at which the framework begins to collapse. For **2**, the weight loss of about 12.44 % from the room temperature to 350 °C corresponds to the loss of three

lattice and two coordinated water molecules (calcd 12.64 %), and the remaining framework is thermally stable up to 368 °C, at which the framework begins to collapse. For **3**, the weight loss of about 15.4 % from the room temperature to 175 °C corresponds to the release of one lattice and seven coordinated water molecules (calcd 15.7 %), and the remaining framework is thermally stable up to 282 °C. The framework begins to collapse upon further heating. For **4**, the weight loss of about 15.63 % from the room temperature to 149 °C corresponds to the departure of one lattice and seven coordinated water molecules (calcd 15.72 %), and the remaining framework is thermally stable up to 239 °C. The framework begins to collapse upon further heating. For **5**, the weight loss of about 8.24 % from the room temperature to 241 °C is the equal of the departure of two lattice and four coordinated water molecules (calcd 8.39 %), and the remaining framework is thermally stable up to 242 °C, at which the framework begins to collapse. For **6**, the weight loss of about 4.16 % from the room temperature to 397 °C is the equal of the departure of two lattice and two coordinated water molecules (calcd 4.80 %), and the remaining framework is thermally stable up to 403 °C, at which the framework begins to collapse. For **7**, the weight loss of about 23.90 % from the room temperature to 282 °C is the equivalent of the departure of thirteen lattice and four coordinated water molecules (calcd 24.52 %), and the remaining framework is thermally stable up to 284 °C, at which the framework begins to collapse. For complexes **1-7**, the theoretical calculated percent of metal oxide are 20.74 %, 20.08 %, 16.30 %, 16.36 %, 17.74 %, 19.89 % and 23.90 %, respectively, but the experimental data are 51.97 %, 62.86 %, 33.63 %, 18.06 %, 43.68 %, 47.95 %, and 40.03 % at 800 °C, respectively. The final decomposition products are not metallic oxides, and there are still some organic compositions left even at 800 °C.

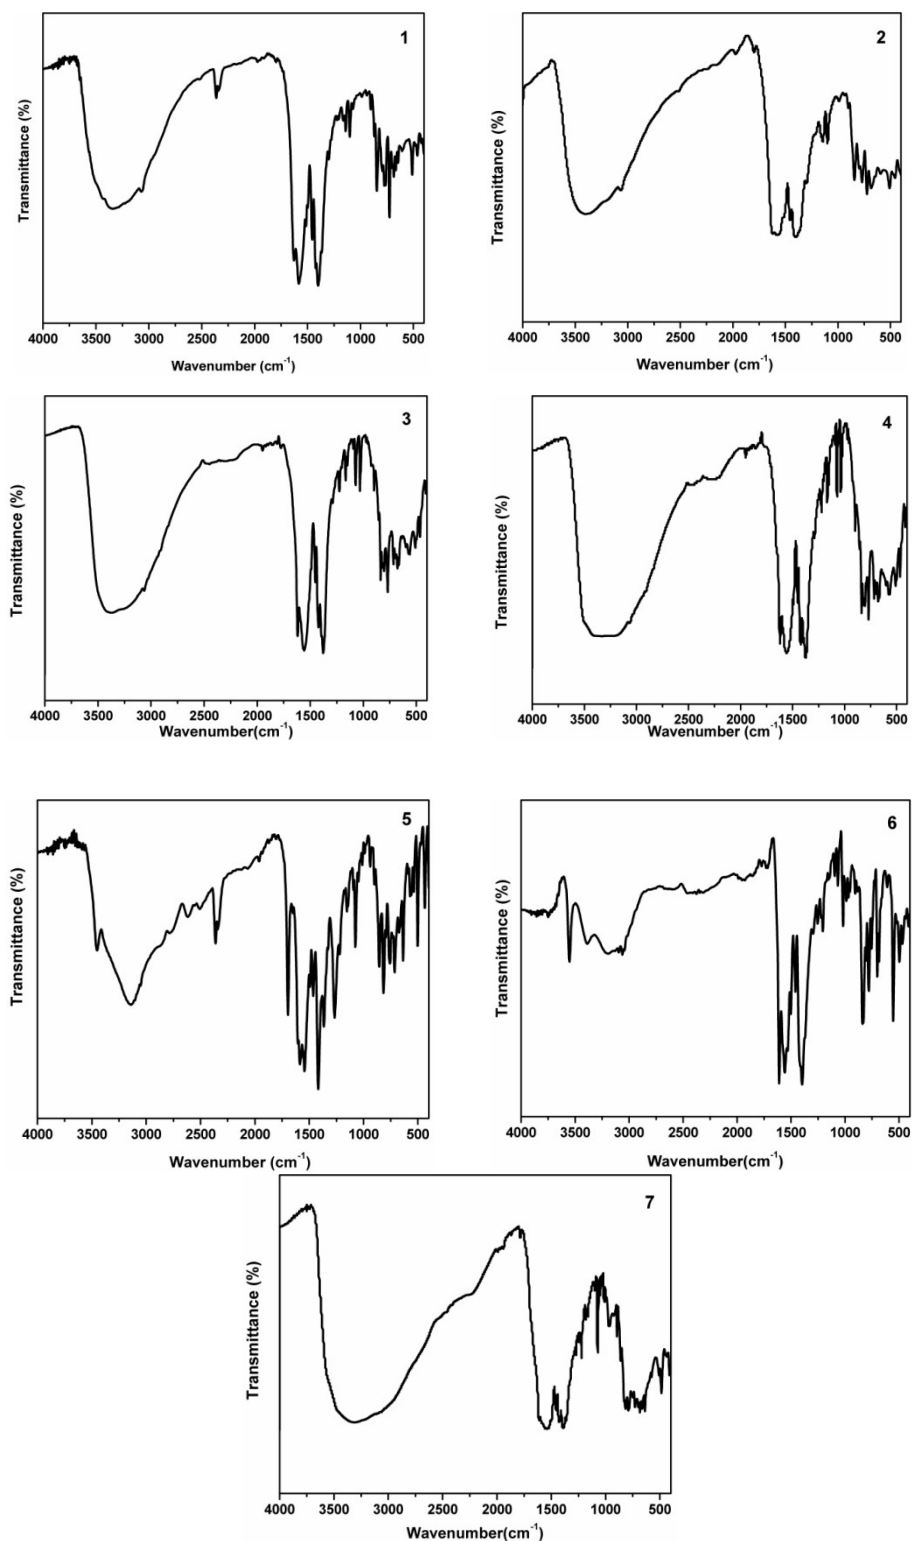

**Fig. S6.** Infrared spectra of 1-7.

The absence of the  $\nu(\text{C}=\text{O})$  absorption band in the area of  $1700\text{ cm}^{-1}$  indicates full deprotonation of carboxylate groups in complex 1, 2, 3, 4, 6 and 7, which are consistent with the results of single-crystal X-ray analysis. In 5, the presence of the  $\nu(\text{C}=\text{O})$  absorption because carboxylate groups are partially deprotonated.

**Table S1.** Main bond lengths [ $\text{\AA}$ ] and angles [ $^\circ$ ] for **1**.

| Bond                | Distance   | Bond                | Distance   |
|---------------------|------------|---------------------|------------|
| Co(1)-O(8)#1        | 2.016(2)   | Co(2)-O(6)#3        | 2.014(3)   |
| Co(1)-O(3)#2        | 2.072(2)   | Co(2)-O(9)          | 2.050(3)   |
| Co(1)-N(2)          | 2.1047(12) | Co(2)-O(7)#1        | 2.064(2)   |
| Co(1)-N(1)          | 2.1335(11) | Co(2)-O(4)#2        | 2.080(2)   |
| Co(1)-O(2)          | 2.175(2)   | Co(2)-O(2)          | 2.134(2)   |
| Co(1)-O(1)          | 2.234(2)   | Co(2)-O(10)         | 2.1703(12) |
| Moiety              | Angle      | Moiety              | Angle      |
| O(8)#1-Co(1)-O(3)#2 | 97.35(10)  | O(6)#3-Co(2)-O(9)   | 99.1(2)    |
| O(8)#1-Co(1)-N(2)   | 101.92(8)  | O(6)#3-Co(2)-O(7)#1 | 88.13(12)  |
| O(3)#2-Co(1)-N(2)   | 93.13(7)   | O(9)-Co(2)-O(7)#1   | 161.89(15) |
| O(8)#1-Co(1)-N(1)   | 86.55(7)   | O(6)#3-Co(2)-O(4)#2 | 169.39(13) |
| O(3)#2-Co(1)-N(1)   | 78.6       | O(9)-Co(2)-O(4)#2   | 88.78(19)  |
| N(2)-Co(1)-N(1)     | 171.47(8)  | O(7)#1-Co(2)-O(4)#2 | 86.39(11)  |
| O(8)#1-Co(1)-O(2)   | 106.32(9)  | O(6)#3-Co(2)-O(2)   | 85.00(11)  |
| O(3)#2-Co(1)-O(2)   | 89.91(9)   | O(9)-Co(2)-O(2)     | 96.38(13)  |
| N(2)-Co(1)-O(2)     | 150.95(7)  | O(7)#1-Co(2)-O(2)   | 100.79(9)  |
| N(1)-Co(1)-O(2)     | 96.29(7)   | O(4)#2-Co(2)-O(2)   | 87.12(10)  |
| O(8)#1-Co(1)-O(1)   | 164.59(10) | O(6)#3-Co(2)-O(10)  | 99.01(10)  |
| O(3)#2-Co(1)-O(1)   | 88.06(10)  | O(9)-Co(2)-O(10)    | 84.47(12)  |
| N(2)-Co(1)-O(1)     | 92.12(7)   | O(7)#1-Co(2)-O(10)  | 77.99(7)   |
| N(1)-Co(1)-O(1)     | 90.10(7)   | O(4)#2-Co(2)-O(10)  | 88.73(8)   |
| O(2)-Co(1)-O(1)     | 59.09(9)   | O(2)-Co(2)-O(10)    | 175.74(7)  |

Symmetry transformations used to generate equivalent atoms:

- |                            |                            |
|----------------------------|----------------------------|
| #1 $y+1/2, -x+3/2, -z+3/2$ | #2 $x, y, z-1$             |
| #3 $y+1/2, -x+3/2, -z+5/2$ | #4 $x, y, z+1$             |
| #5 $-y+3/2, x-1/2, -z+5/2$ | #6 $-y+3/2, x-1/2, -z+3/2$ |



**Table S2.** Main bond lengths [ $\text{\AA}$ ] and angles [ $^\circ$ ] for **2**.

| Bond                | Distance   | Bond                | Distance   |
|---------------------|------------|---------------------|------------|
| Mn(1)-O(8)#1        | 2.078(4)   | Mn(2)-O(6)#3        | 2.083(5)   |
| Mn(1)-O(3)#2        | 2.136(4)   | Mn(2)-O(9)          | 2.160(6)   |
| Mn(1)-O(2)          | 2.213(4)   | Mn(2)-O(4)#2        | 2.159(4)   |
| Mn(1)-N(2)          | 2.227(5)   | Mn(2)-O(7)#1        | 2.164(4)   |
| Mn(1)-N(1)          | 2.259(5)   | Mn(2)-O(2)          | 2.214(4)   |
| Mn(1)-O(1)          | 2.425(5)   | Mn(2)-O(10)         | 2.267(6)   |
| Moiety              | Angle      | Moiety              | Angle      |
| O(8)#1-Mn(1)-O(3)#2 | 100.45(18) | O(6)#3-Mn(2)-O(9)   | 103.1(4)   |
| O(8)#1-Mn(1)-O(2)   | 109.55(18) | O(6)#3-Mn(2)-O(4)#2 | 169.1(2)   |
| O(3)#2-Mn(1)-O(2)   | 90.30(16)  | O(9)-Mn(2)-O(4)#2   | 84.9(3)    |
| O(8)#1-Mn(1)-N(2)   | 103.95(19) | O(6)#3-Mn(2)-O(7)#1 | 89.3(2)    |
| O(3)#2-Mn(1)-N(2)   | 94.61(18)  | O(9)-Mn(2)-O(7)#1   | 157.8(3)   |
| O(2)-Mn(1)-N(2)     | 144.62(17) | O(4)#2-Mn(2)-O(7)#1 | 85.60(19)  |
| O(8)#1-Mn(1)-N(1)   | 88.14(18)  | O(6)#3-Mn(2)-O(2)   | 86.4(2)    |
| O(3)#2-Mn(1)-N(1)   | 166.81(18) | O(9)-Mn(2)-O(2)     | 98.5(2)    |
| O(2)-Mn(1)-N(1)     | 96.27(17)  | O(4)#2-Mn(2)-O(2)   | 85.03(17)  |
| N(2)-Mn(1)-N(1)     | 73.5(2)    | O(7)#1-Mn(2)-O(2)   | 100.59(16) |
| O(8)#1-Mn(1)-O(1)   | 163.74(18) | O(6)#3-Mn(2)-O(10)  | 100.0(3)   |
| O(3)#2-Mn(1)-O(1)   | 88.17(17)  | O(9)-Mn(2)-O(10)    | 83.1(3)    |
| O(2)-Mn(1)-O(1)     | 56.19(15)  | O(4)#2-Mn(2)-O(10)  | 88.2(2)    |
| N(2)-Mn(1)-O(1)     | 88.92(17)  | O(7)#1-Mn(2)-O(10)  | 76.6(2)    |
| N(1)-Mn(1)-O(1)     | 86.04(16)  | O(2)-Mn(2)-O(10)    | 172.9(2)   |

Symmetry transformations used to generate equivalent atoms:

- |                            |                            |
|----------------------------|----------------------------|
| #1 $y-1/2, -x+1/2, -z+1/2$ | #2 $x, y, z+1$             |
| #3 $y-1/2, -x+1/2, -z-1/2$ | #4 $x, y, z-1$             |
| #5 $-y+1/2, x+1/2, -z-1/2$ | #6 $-y+1/2, x+1/2, -z+1/2$ |

**Table S3.** Main bond lengths [Å] and angles [°] for **3**.

| Bond               | Distance   | Bond               | Distance   |
|--------------------|------------|--------------------|------------|
| Co(1)-O(1)         | 2.079(3)   | Co(2)-O(7)         | 2.027(3)   |
| Co(1)-O(11)        | 2.094(3)   | Co(2)-N(2)#2       | 2.079(4)   |
| Co(1)-N(1)         | 2.103(3)   | Co(2)-O(13)        | 2.097(4)   |
| Co(1)-O(10)        | 2.111(3)   | Co(2)-O(15)        | 2.126(3)   |
| Co(1)-O(6)#1       | 2.115(3)   | Co(2)-O(12)        | 2.136(4)   |
| Co(1)-O(9)         | 2.162(3)   | Co(2)-O(14)        | 2.184(3)   |
| Moiety             | Angle      | Moiety             | Angle      |
| O(1)-Co(1)-O(11)   | 98.21(13)  | O(7)-Co(2)-N(2)#2  | 175.56(13) |
| O(1)-Co(1)-N(1)    | 93.41(12)  | O(7)-Co(2)-O(13)   | 90.86(14)  |
| O(11)-Co(1)-N(1)   | 94.07(13)  | N(2)#2-Co(2)-O(13) | 93.51(15)  |
| O(1)-Co(1)-O(10)   | 172.33(13) | O(7)-Co(2)-O(15)   | 84.54(12)  |
| O(11)-Co(1)-O(10)  | 88.76(14)  | N(2)#2-Co(2)-O(15) | 91.05(13)  |
| N(1)-Co(1)-O(10)   | 89.28(13)  | O(13)-Co(2)-O(15)  | 174.77(14) |
| O(1)-Co(1)-O(6)#1  | 82.18(11)  | O(7)-Co(2)-O(12)   | 89.37(14)  |
| O(11)-Co(1)-O(6)#1 | 179.13(11) | N(2)#2-Co(2)-O(12) | 90.95(15)  |
| N(1)-Co(1)-O(6)#1  | 86.68(13)  | O(13)-Co(2)-O(12)  | 95.79(16)  |
| O(10)-Co(1)-O(6)#1 | 90.82(13)  | O(15)-Co(2)-O(12)  | 86.68(14)  |
| O(1)-Co(1)-O(9)    | 87.65(12)  | O(7)-Co(2)-O(14)   | 85.88(13)  |
| O(11)-Co(1)-O(9)   | 85.83(13)  | N(2)#2-Co(2)-O(14) | 93.39(14)  |
| N(1)-Co(1)-O(9)    | 178.94(14) | O(13)-Co(2)-O(14)  | 89.47(14)  |
| O(10)-Co(1)-O(9)   | 89.67(13)  | O(15)-Co(2)-O(14)  | 87.71(12)  |
| O(6)#1-Co(1)-O(9)  | 93.41(12)  | O(12)-Co(2)-O(14)  | 172.97(14) |

Symmetry transformations used to generate equivalent atoms:

#1 -x+2,-y,-z+1    #2 -x+1,-y,-z+2

**Table S4.** Main bond lengths [ $\text{\AA}$ ] and angles [ $^\circ$ ] for **4**.

| Bond                | Distance  | Bond              | Distance |
|---------------------|-----------|-------------------|----------|
| Ni(1)-O(1)          | 1.981(5)  | Ni(2)-O(5)        | 2.046(5) |
| Ni(1)-N(1)          | 2.029(6)  | Ni(2)-N(2)#1      | 2.054(6) |
| Ni(1)-O(9)          | 2.052(5)  | Ni(2)-O(14)       | 2.058(5) |
| Ni(1)-O(11)         | 2.079(6)  | Ni(2)-O(15)       | 2.065(5) |
| Ni(1)-O(12)         | 2.111(5)  | Ni(2)-O(3)#2      | 2.075(5) |
| Ni(1)-O(10)         | 2.154(5)  | Ni(2)-O(13)       | 2.113(5) |
| Moiety              | Angle     | Moiety            | Angle    |
| O(5)-Ni(2)-N(2)#1   | 93.0(2)   | O(1)-Ni(1)-N(1)   | 175.1(2) |
| O(5)-Ni(2)-O(14)    | 97.7(2)   | O(1)-Ni(1)-O(9)   | 91.2(2)  |
| N(2)#1-Ni(2)-O(14)  | 92.3(2)   | N(1)-Ni(1)-O(9)   | 93.6(2)  |
| O(5)-Ni(2)-O(15)    | 173.7(2)  | O(1)-Ni(1)-O(11)  | 89.1(2)  |
| N(2)#1-Ni(2)-O(15)  | 89.5(2)   | N(1)-Ni(1)-O(11)  | 91.2(2)  |
| O(14)-Ni(2)-O(15)   | 88.0(2)   | O(9)-Ni(1)-O(11)  | 96.4(2)  |
| O(5)-Ni(2)-O(3)#2   | 82.21(19) | O(1)-Ni(1)-O(12)  | 84.4(2)  |
| N(2)#1-Ni(2)-O(3)#2 | 87.1(2)   | N(1)-Ni(1)-O(12)  | 90.7(2)  |
| O(14)-Ni(2)-O(3)#2  | 179.4(2)  | O(9)-Ni(1)-O(12)  | 174.9(2) |
| O(15)-Ni(2)-O(3)#2  | 92.2(2)   | O(11)-Ni(1)-O(12) | 86.1(2)  |
| O(5)-Ni(2)-O(13)    | 87.4(2)   | O(1)-Ni(1)-O(10)  | 86.1(2)  |
| N(2)#1-Ni(2)-O(13)  | 179.4(2)  | N(1)-Ni(1)-O(10)  | 93.2(2)  |
| O(14)-Ni(2)-O(13)   | 87.2(2)   | O(9)-Ni(1)-O(10)  | 88.8(2)  |
| O(15)-Ni(2)-O(13)   | 90.2(2)   | O(11)-Ni(1)-O(10) | 172.9(2) |
| O(3)#2-Ni(2)-O(13)  | 93.4(2)   | O(12)-Ni(1)-O(10) | 88.3(2)  |

Symmetry transformations used to generate equivalent atoms:

#1 -x+2,-y+1,-z-1      #2 -x+1,-y+1,-z

**Table S5.** Main bond lengths [ $\text{\AA}$ ] and angles [ $^\circ$ ] for **5**.

| Bond                | Distance   | Bond                 | Distance   |
|---------------------|------------|----------------------|------------|
| Co(1)-O(3)#1        | 2.008(3)   | Co(2)-O(7)           | 2.056(3)   |
| Co(1)-O(9)          | 2.035(3)   | Co(2)-O(7)#2         | 2.056(3)   |
| Co(1)-O(1)          | 2.041(3)   | Co(2)-O(10)          | 2.130(4)   |
| Co(1)-N(1)          | 2.073(4)   | Co(2)-O(10)#2        | 2.130(4)   |
| Co(1)-O(4)#1        | 2.385(3)   | Co(2)-N(2)#3         | 2.156(4)   |
|                     |            | Co(2)-N(2)#4         | 2.156(4)   |
| Moiety              | Angle      | Moiety               | Angle      |
| O(3)#1-Co(1)-O(9)   | 102.54(15) | O(7)-Co(2)-O(10)#2   | 94.76(15)  |
| O(3)#1-Co(1)-O(1)   | 104.42(13) | O(7)#2-Co(2)-O(10)#2 | 85.24(15)  |
| O(9)-Co(1)-O(1)     | 94.11(13)  | O(10)-Co(2)-O(10)#2  | 179.998(1) |
| O(3)#1-Co(1)-N(1)   | 136.75(15) | O(7)-Co(2)-N(2)#3    | 89.95(15)  |
| O(9)-Co(1)-N(1)     | 99.15(15)  | O(7)#2-Co(2)-N(2)#3  | 90.05(15)  |
| O(1)-Co(1)-N(1)     | 110.84(14) | O(10)-Co(2)-N(2)#3   | 92.06(15)  |
| O(3)#1-Co(1)-O(4)#1 | 58.92(12)  | O(10)#2-Co(2)-N(2)#3 | 87.94(15)  |
| O(9)-Co(1)-O(4)#1   | 79.45(13)  | O(7)-Co(2)-N(2)#4    | 90.05(15)  |
| O(1)-Co(1)-O(4)#1   | 159.50(12) | O(7)#2-Co(2)-N(2)#4  | 89.95(15)  |
| N(1)-Co(1)-O(4)#1   | 89.48(13)  | O(10)-Co(2)-N(2)#4   | 87.94(15)  |
| O(7)-Co(2)-O(7)#2   | 179.998(1) | O(10)#2-Co(2)-N(2)#4 | 92.06(15)  |
| O(7)-Co(2)-O(10)    | 85.24(15)  | N(2)#3-Co(2)-N(2)#4  | 180.0(2)   |
| O(7)#2-Co(2)-O(10)  | 94.76(15)  |                      |            |

Symmetry transformations used to generate equivalent atoms:

- #1  $-x, -y+1, -z+2$     #2  $-x+1, -y+1, -z+2$   
#3  $x, -y+1/2, z+1/2$     #4  $-x+1, y+1/2, -z+3/2$   
#5  $-x+1, y-1/2, -z+3/2$

**Table S6.** Main bond lengths [ $\text{\AA}$ ] and angles [ $^\circ$ ] for **6**.

| Bond              | Distance   | Bond                 | Distance   |
|-------------------|------------|----------------------|------------|
| Co(1)-O(1)        | 2.036(2)   | Co(1)-O(8)#1         | 2.197(2)   |
| Co(1)-N(1)        | 2.112(3)   | Co(2)-O(5)#2         | 1.966(2)   |
| Co(1)-O(9)        | 2.137(3)   | Co(2)-O(6)#3         | 2.008(3)   |
| Co(1)-N(2)        | 2.142(3)   | Co(2)-O(4)           | 2.018(3)   |
| Co(1)-O(7)#1      | 2.180(2)   | Co(2)-N(3)           | 2.039(3)   |
| Moiety            | Angle      | Moiety               | Angle      |
| O(1)-Co(1)-N(1)   | 97.16(11)  | O(7)#1-Co(1)-O(8)#1  | 60.15(9)   |
| O(1)-Co(1)-O(9)   | 90.88(10)  | O(1)-Co(1)-C(14)#1   | 137.06(11) |
| N(1)-Co(1)-O(9)   | 85.45(11)  | N(1)-Co(1)-C(14)#1   | 125.77(12) |
| O(1)-Co(1)-N(2)   | 84.56(10)  | O(9)-Co(1)-C(14)#1   | 91.54(11)  |
| N(1)-Co(1)-N(2)   | 106.28(12) | N(2)-Co(1)-C(14)#1   | 84.23(11)  |
| O(9)-Co(1)-N(2)   | 167.83(11) | O(7)#1-Co(1)-C(14)#1 | 30.25(10)  |
| O(1)-Co(1)-O(7)#1 | 107.35(10) | O(8)#1-Co(1)-C(14)#1 | 29.94(10)  |
| N(1)-Co(1)-O(7)#1 | 154.21(11) | O(5)#2-Co(2)-O(6)#3  | 103.50(11) |
| O(9)-Co(1)-O(7)#1 | 86.24(10)  | O(5)#2-Co(2)-O(4)    | 137.81(11) |
| N(2)-Co(1)-O(7)#1 | 84.37(10)  | O(6)#3-Co(2)-O(4)    | 97.12(11)  |
| O(1)-Co(1)-O(8)#1 | 165.94(9)  | O(5)#2-Co(2)-N(3)    | 110.16(11) |
| N(1)-Co(1)-O(8)#1 | 96.24(11)  | O(6)#3-Co(2)-N(3)    | 101.14(11) |
| O(9)-Co(1)-O(8)#1 | 94.42(10)  | O(4)-Co(2)-N(3)      | 101.21(12) |
| N(2)-Co(1)-O(8)#1 | 87.60(11)  |                      |            |

Symmetry transformations used to generate equivalent atoms:

#1  $x+1, y-1, z$     #2  $x+1, y, z$     #3  $-x-1, -y+3, -z+1$

#4  $x-1, y, z$     #5  $x-1, y+1, z$     #6  $-x+1, -y+3, -z$

#7  $-x, -y+1, -z$     #8  $-x-1, -y+4, -z+1$

**Table S7.** Main bond lengths [Å] and angles [°] for 7.

| Bond               | Distance   | Bond                | Distance   |
|--------------------|------------|---------------------|------------|
| Ni(1)-O(12)        | 2.041(3)   | Ni(3)-O(10)         | 2.011(3)   |
| Ni(1)-O(1)         | 2.056(3)   | Ni(3)-O(12)         | 2.050(3)   |
| Ni(1)-O(10)        | 2.057(3)   | Ni(3)-N(3)          | 2.066(3)   |
| Ni(1)-N(2)#1       | 2.060(3)   | Ni(3)-O(11)         | 2.084(3)   |
| Ni(1)-O(9)         | 2.065(3)   | Ni(3)-O(5)#2        | 2.089(3)   |
| Ni(1)-O(13)        | 2.113(3)   | Ni(3)-O(7)#2        | 2.113(3)   |
| Ni(2)-O(10)        | 2.025(3)   | Ni(4)-O(9)          | 2.040(3)   |
| Ni(2)-O(9)         | 2.042(3)   | Ni(4)-O(12)         | 2.044(3)   |
| Ni(2)-O(11)        | 2.074(3)   | Ni(4)-O(11)         | 2.057(3)   |
| Ni(2)-O(2)         | 2.090(3)   | Ni(4)-N(1)          | 2.080(3)   |
| Ni(2)-O(14)        | 2.090(4)   | Ni(4)-O(16)         | 2.081(3)   |
| Ni(2)-N(4)         | 2.094(3)   | Ni(4)-O(15)         | 2.113(4)   |
| Moiety             | Angle      | Moiety              | Angle      |
| O(12)-Ni(1)-O(1)   | 166.53(11) | O(10)-Ni(2)-Ni(1)   | 43.31(7)   |
| O(12)-Ni(1)-O(10)  | 81.44(11)  | O(9)-Ni(2)-Ni(1)    | 43.57(8)   |
| O(1)-Ni(1)-O(10)   | 87.82(11)  | O(11)-Ni(2)-Ni(1)   | 85.33(8)   |
| O(12)-Ni(1)-N(2)#1 | 98.49(12)  | O(2)-Ni(2)-Ni(1)    | 79.55(8)   |
| O(1)-Ni(1)-N(2)#1  | 92.67(12)  | O(14)-Ni(2)-Ni(1)   | 129.59(10) |
| O(10)-Ni(1)-N(2)#1 | 176.93(14) | N(4)-Ni(2)-Ni(1)    | 142.50(10) |
| O(12)-Ni(1)-O(9)   | 80.06(12)  | O(10)-Ni(3)-O(12)   | 82.33(11)  |
| O(1)-Ni(1)-O(9)    | 90.80(11)  | O(10)-Ni(3)-N(3)    | 92.48(12)  |
| O(10)-Ni(1)-O(9)   | 83.96(11)  | O(12)-Ni(3)-N(3)    | 173.80(13) |
| N(2)#1-Ni(1)-O(9)  | 99.05(12)  | O(10)-Ni(3)-O(11)   | 79.56(12)  |
| O(12)-Ni(1)-O(13)  | 92.70(13)  | O(12)-Ni(3)-O(11)   | 81.21(11)  |
| O(1)-Ni(1)-O(13)   | 95.09(13)  | N(3)-Ni(3)-O(11)    | 94.56(12)  |
| O(10)-Ni(1)-O(13)  | 88.26(12)  | O(10)-Ni(3)-O(5)#2  | 169.33(11) |
| N(2)#1-Ni(1)-O(13) | 88.68(13)  | O(12)-Ni(3)-O(5)#2  | 87.44(11)  |
| O(9)-Ni(1)-O(13)   | 170.07(12) | N(3)-Ni(3)-O(5)#2   | 97.54(12)  |
| O(12)-Ni(1)-Ni(2)  | 86.30(8)   | O(11)-Ni(3)-O(5)#2  | 95.93(12)  |
| O(1)-Ni(1)-Ni(2)   | 80.29(8)   | O(10)-Ni(3)-O(7)#2  | 93.38(12)  |
| O(10)-Ni(1)-Ni(2)  | 42.47(8)   | O(12)-Ni(3)-O(7)#2  | 90.31(11)  |
| N(2)#1-Ni(1)-Ni(2) | 140.59(10) | N(3)-Ni(3)-O(7)#2   | 93.39(13)  |
| O(9)-Ni(1)-Ni(2)   | 42.97(7)   | O(11)-Ni(3)-O(7)#2  | 169.58(11) |
| O(13)-Ni(1)-Ni(2)  | 130.37(9)  | O(5)#2-Ni(3)-O(7)#2 | 89.69(12)  |
| O(10)-Ni(2)-O(9)   | 85.36(11)  | O(9)-Ni(4)-O(12)    | 80.58(11)  |
| O(10)-Ni(2)-O(11)  | 79.50(12)  | O(9)-Ni(4)-O(11)    | 80.95(10)  |
| O(9)-Ni(2)-O(11)   | 80.49(10)  | O(12)-Ni(4)-O(11)   | 82.00(11)  |
| O(10)-Ni(2)-O(2)   | 85.77(11)  | O(9)-Ni(4)-N(1)     | 94.47(12)  |
| O(9)-Ni(2)-O(2)    | 92.07(10)  | O(12)-Ni(4)-N(1)    | 96.16(13)  |
| O(11)-Ni(2)-O(2)   | 163.95(12) | O(11)-Ni(4)-N(1)    | 175.27(13) |
| O(10)-Ni(2)-O(14)  | 172.87(12) | O(9)-Ni(4)-O(16)    | 168.19(12) |

|                   |            |                   |            |
|-------------------|------------|-------------------|------------|
| O(9)-Ni(2)-O(14)  | 87.60(13)  | O(12)-Ni(4)-O(16) | 92.55(14)  |
| O(11)-Ni(2)-O(14) | 100.40(16) | O(11)-Ni(4)-O(16) | 88.62(12)  |
| O(2)-Ni(2)-O(14)  | 93.42(16)  | N(1)-Ni(4)-O(16)  | 95.82(14)  |
| O(10)-Ni(2)-N(4)  | 100.00(12) | O(9)-Ni(4)-O(15)  | 96.24(13)  |
| O(9)-Ni(2)-N(4)   | 173.30(13) | O(12)-Ni(4)-O(15) | 173.47(13) |
| O(11)-Ni(2)-N(4)  | 96.45(12)  | O(11)-Ni(4)-O(15) | 91.89(13)  |
| O(2)-Ni(2)-N(4)   | 92.33(12)  | N(1)-Ni(4)-O(15)  | 89.75(15)  |
| O(14)-Ni(2)-N(4)  | 87.10(14)  | O(16)-Ni(4)-O(15) | 89.60(15)  |
| Ni(4)-O(9)-Ni(2)  | 99.71(11)  | Ni(4)-O(11)-Ni(2) | 98.10(11)  |
| Ni(4)-O(9)-Ni(1)  | 99.13(12)  | Ni(4)-O(11)-Ni(3) | 96.55(12)  |
| Ni(2)-O(9)-Ni(1)  | 93.46(11)  | Ni(2)-O(11)-Ni(3) | 98.25(12)  |
| Ni(3)-O(10)-Ni(2) | 102.35(13) | Ni(1)-O(12)-Ni(4) | 99.78(13)  |
| Ni(3)-O(10)-Ni(1) | 97.75(11)  | Ni(1)-O(12)-Ni(3) | 97.03(11)  |
| Ni(2)-O(10)-Ni(1) | 94.22(11)  | Ni(4)-O(12)-Ni(3) | 98.06(12)  |

---

Symmetry transformations used to generate equivalent atoms:

#1  $-x+1, -y, -z$     #2  $-y+1/4, x-1/4, z-1/4$

#3  $y+1/4, -x+1/4, z+1/4$     #4  $-x+0, -y+1/2, z+0$

**Table S8.** Parameters of hydrogen bonds (Å, °) for **3** and **4**.

| D-H      | d(D-H) | d(H...A) | <DHA   | d(D..A) | A                        |
|----------|--------|----------|--------|---------|--------------------------|
| <b>3</b> |        |          |        |         |                          |
| O9-H9A   | 0.844  | 2.538    | 143.75 | 3.257   | O3 [ -x+2, -y, -z ]      |
| O10-H10B | 0.851  | 1.927    | 159.32 | 2.740   | O5 [ -x+2, -y, -z+1 ]    |
| O10-H10C | 0.856  | 1.867    | 164.21 | 2.700   | O4 [ -x+2, -y, -z ]      |
| O11-H11A | 0.847  | 1.907    | 162.66 | 2.727   | O2                       |
| O11-H11B | 0.851  | 1.963    | 156.38 | 2.763   | O3 [ -x+2, -y, -z ]      |
| O12-H12A | 0.847  | 1.888    | 165.80 | 2.717   | O16 [ -x+2, -y-1, -z+1 ] |
| O13-H13A | 0.860  | 2.084    | 161.86 | 2.913   | O4 [ x-1, y, z+1 ]       |
| O14-H14A | 0.853  | 2.118    | 159.11 | 2.930   | O3 [ -x+2, -y, -z+1 ]    |
| O14-H14B | 0.842  | 2.098    | 165.18 | 2.920   | O6                       |
| O15-H15B | 0.844  | 1.853    | 159.62 | 2.660   | O16 [ x, y, z+1 ]        |
| O15-H15C | 0.824  | 2.013    | 172.41 | 2.831   | O5                       |
| O16-H16B | 0.835  | 2.370    | 132.05 | 2.994   | O5 [ -x+2, -y-1, -z+1 ]  |
| O16-H16C | 0.843  | 1.787    | 178.30 | 2.629   | O2                       |
| C19-H19A | 0.930  | 2.524    | 139.73 | 3.289   | O8 [ -x+1, -y, -z+1 ]    |
| C27-H27A | 0.930  | 2.469    | 153.89 | 3.329   | O5 [ x-1, y+1, z ]       |
| <b>4</b> |        |          |        |         |                          |
| O9-H9A   | 0.842  | 1.981    | 147.77 | 2.730   | O2                       |
| O9-H9B   | 0.842  | 2.079    | 158.60 | 2.879   | O7 [ x+1, y, z-1 ]       |
| O10-H10A | 0.843  | 2.107    | 163.63 | 2.925   | O3                       |
| O10-H10B | 0.847  | 2.132    | 167.53 | 2.964   | O8 [ -x+1, -y+1, -z ]    |
| O11-H11A | 0.850  | 1.955    | 146.24 | 2.703   | O16 [ -x+1, -y+2, -z ]   |
| O11-H11B | 0.853  | 2.357    | 125.61 | 2.936   | O7 [ -x+1, -y+2, -z ]    |
| O12-H12A | 0.841  | 1.918    | 142.97 | 2.639   | O16 [ x, y, z-1 ]        |
| O12-H12B | 0.828  | 2.223    | 138.91 | 2.898   | O13 [ -x+1, -y+1, -z ]   |
| O13-H13A | 0.847  | 2.092    | 158.98 | 2.898   | O12 [ -x+1, -y+1, -z ]   |
| O13-H13B | 0.851  | 2.307    | 135.55 | 2.974   | O6 [ -x+1, -y+1, -z+1 ]  |
| O14-H14B | 0.832  | 1.881    | 172.20 | 2.707   | O6                       |
| O14-H14C | 0.887  | 1.921    | 162.45 | 2.780   | O8 [ -x+1, -y+1, -z+1 ]  |
| O15-H15B | 0.845  | 1.900    | 158.60 | 2.704   | O7 [ -x+1, -y+1, -z+1 ]  |
| O15-H15C | 0.858  | 1.935    | 155.01 | 2.737   | O4 [ -x+1, -y+1, -z ]    |
| O16-H16C | 0.847  | 1.816    | 155.31 | 2.610   | O6                       |
| O16-H16B | 0.838  | 2.288    | 137.09 | 2.957   | O4 [ -x+1, -y+2, -z ]    |
| C17-H17A | 0.930  | 2.444    | 152.13 | 3.295   | O4 [ -x+1, -y+2, -z-1 ]  |
| C17-H17A | 0.930  | 2.444    | 152.13 | 3.295   | O4 [ -x+1, -y+2, -z-1 ]  |
| C25-H25A | 0.930  | 2.499    | 138.09 | 3.251   | O2 [ x, y, z-1 ]         |
| C28-H28A | 0.930  | 2.632    | 115.59 | 3.148   | O5 [ -x+2, -y+1, -z-1 ]  |

There are typical strong O–H···O and weak C–H···O hydrogen bonding interactions within and between the chains of **3**: The coordinated water molecules (O9, O10, O11, O13, O14 and O15) are involved in stronger intrachain hydrogen bonds with the uncoordinated carboxylate oxygen atoms (O2, O3, O4, O5 and O8) with O···O separations between 2.629 and 2.930 Å, and the carboxylate



oxygen atom (O6) with O···O separation is 2.920 Å; the interchain O–H···O hydrogen bonds exist between the coordinated water molecules (O9, O10, O11, O12 and O15) and uncoordinated carboxylate oxygen atoms (O2, O3, O4) with O···O separations varying from 2.660 to 3.257 Å, which extend 1D chains into a 3D supramolecular network. Meanwhile, the lattice water molecules (O16) are intercalated between chains, forming O–H···O hydrogen bonds with the carboxylate O atoms (O2 and O5) and coordination water molecules (O12 and O15) and with each other, as indicated by the H···O and O···O distances in the ranges of 1.787–2.370 and 2.629–2.994 Å. The interchain C–H···O hydrogen bonds exist between the bpea ligand (C19 and C27) and uncoordinated carboxylate oxygen atoms (O8 and O5) with C···O separations varying from 3.148 to 3.329 Å.

**Table S9.** The comparison of the dihedral angles for **1-7**.

| Complex | The dihedral angle of four carboxylate groups (°) |       |       |       | The dihedral angle between the two phenyl rings (°) | N-donor ligands | Dimension |
|---------|---------------------------------------------------|-------|-------|-------|-----------------------------------------------------|-----------------|-----------|
|         | 2                                                 | 3     | 3'    | 4'    |                                                     |                 |           |
| 1,2     | 70.33                                             | 37.51 | 62.17 | 36.11 | 60.04                                               | phen            | 1D        |
| 3,4     | 69.36                                             | 35.33 | 76.10 | 20.66 | 49.54                                               | bpea            | 1D        |
| 5       | 89.02                                             | 5.21  | 65.53 | 33.87 | 54.09                                               | bipy            | 3D        |
| 6       | 78.05                                             | 30.78 | 77.62 | 9.77  | 48.48                                               | bpee            | 3D        |
| 7       | 73.30                                             | 33.89 | 88.98 | 37.27 | 56.92                                               | bipy            | 3D        |
